# Supplementary material for: Predicting 30‐day return hospital admissions in patients with COVID‐19 discharged from the emergency department: A national retrospective cohort study
Source: PubMed Central journal article supplement — J Am Coll Emerg Physicians Open. 2021 Dec 29;2(6):e12595. doi: 10.1002/emp2.12595 (PMC8716570; doi:10.1002/emp2.12595), 2021-12-29
Supplement: EMP2-2-e12595-s001.pdf [file EMP2-2-e12595-s001.pdf]

**Supplemental Table 1S:** Index visit patient-level characteristics for patients who returned to ED within 30 days.

|                       | <b>Return ED visit<br/>without<br/>Admission</b> | <b>Return ED<br/>visit with<br/>Admission</b> | <b>p value</b> |
|-----------------------|--------------------------------------------------|-----------------------------------------------|----------------|
|                       | <b>0 (N=1039)</b>                                | <b>1 (N=571)</b>                              |                |
| <b>ems</b>            |                                                  |                                               | < 0.001        |
| No_Unsure             | 962 (92.6%)                                      | 446 (78.1%)                                   |                |
| Yes                   | 77 (7.4%)                                        | 125 (21.9%)                                   |                |
| <b>transferred</b>    |                                                  |                                               | < 0.001        |
| No_Unsure             | 1033 (99.4%)                                     | 550 (96.3%)                                   |                |
| Yes                   | 6 (0.6%)                                         | 21 (3.7%)                                     |                |
| <b>sex</b>            |                                                  |                                               | 0.479          |
| Female                | 525 (50.5%)                                      | 278 (48.7%)                                   |                |
| Male                  | 514 (49.5%)                                      | 293 (51.3%)                                   |                |
| <b>insurance</b>      |                                                  |                                               | < 0.001        |
| Dual                  | 15 (1.4%)                                        | 22 (3.9%)                                     |                |
| Medicaid              | 272 (26.2%)                                      | 96 (16.8%)                                    |                |
| Medicare              | 147 (14.1%)                                      | 153 (26.8%)                                   |                |
| Private               | 398 (38.3%)                                      | 219 (38.4%)                                   |                |
| SelfPay               | 161 (15.5%)                                      | 62 (10.9%)                                    |                |
| Unknown               | 40 (3.8%)                                        | 12 (2.1%)                                     |                |
| WorkersComp           | 6 (0.6%)                                         | 7 (1.2%)                                      |                |
| <b>age</b>            |                                                  |                                               | < 0.001        |
| Mean (SD)             | 43.575 (16.046)                                  | 54.925 (16.400)                               |                |
| Range                 | 18.000 - 95.000                                  | 18.000 - 97.000                               |                |
| <b>cc_sx_ear_pain</b> |                                                  |                                               | 0.001          |

|                               | <b>0 (N=1039)</b> | <b>1 (N=571)</b> | <b>p value</b>    |
|-------------------------------|-------------------|------------------|-------------------|
| N                             | 966 (93.0%)       | 553 (96.8%)      |                   |
| Y                             | 73 (7.0%)         | 18 (3.2%)        |                   |
| <b>cc_sx_rhinorrhea</b>       |                   |                  | <b>0.546</b>      |
| N                             | 809 (77.9%)       | 452 (79.2%)      |                   |
| Y                             | 230 (22.1%)       | 119 (20.8%)      |                   |
| <b>cc_sx_sore_throat</b>      |                   |                  | <b>0.002</b>      |
| N                             | 697 (67.1%)       | 425 (74.4%)      |                   |
| Y                             | 342 (32.9%)       | 146 (25.6%)      |                   |
| <b>cc_sx_cough_dry</b>        |                   |                  | <b>0.002</b>      |
| N                             | 409 (39.4%)       | 180 (31.5%)      |                   |
| Y                             | 630 (60.6%)       | 391 (68.5%)      |                   |
| <b>cc_sx_cough_sputum</b>     |                   |                  | <b>&lt; 0.001</b> |
| N                             | 982 (94.5%)       | 503 (88.1%)      |                   |
| Y                             | 57 (5.5%)         | 68 (11.9%)       |                   |
| <b>cc_sx_cough_hemoptysis</b> |                   |                  | <b>0.702</b>      |
| N                             | 1034 (99.5%)      | 569 (99.6%)      |                   |
| Y                             | 5 (0.5%)          | 2 (0.4%)         |                   |
| <b>cc_sx_chest_pain</b>       |                   |                  | <b>0.031</b>      |
| N                             | 609 (58.6%)       | 366 (64.1%)      |                   |
| Y                             | 430 (41.4%)       | 205 (35.9%)      |                   |
| <b>cc_sx_wheezing</b>         |                   |                  | <b>0.026</b>      |
| N                             | 923 (88.8%)       | 527 (92.3%)      |                   |

|                              | <b>0 (N=1039)</b> | <b>1 (N=571)</b> | <b>p value</b> |
|------------------------------|-------------------|------------------|----------------|
| Y                            | 116 (11.2%)       | 44 (7.7%)        |                |
| <b>cc_sx_sob</b>             |                   |                  | 0.951          |
| N                            | 466 (44.9%)       | 257 (45.0%)      |                |
| Y                            | 573 (55.1%)       | 314 (55.0%)      |                |
| <b>cc_sx_resp_distress</b>   |                   |                  | 0.543          |
| N                            | 1037 (99.8%)      | 569 (99.6%)      |                |
| Y                            | 2 (0.2%)          | 2 (0.4%)         |                |
| <b>cc_sx_fever</b>           |                   |                  | < 0.001        |
| N                            | 393 (37.8%)       | 164 (28.7%)      |                |
| Y                            | 646 (62.2%)       | 407 (71.3%)      |                |
| <b>cc_sx_fatigue_malaise</b> |                   |                  | 0.006          |
| N                            | 790 (76.0%)       | 398 (69.7%)      |                |
| Y                            | 249 (24.0%)       | 173 (30.3%)      |                |
| <b>cc_sx_myalgia</b>         |                   |                  | 0.030          |
| N                            | 647 (62.3%)       | 324 (56.7%)      |                |
| Y                            | 392 (37.7%)       | 247 (43.3%)      |                |
| <b>cc_sx_arthralgia</b>      |                   |                  | 0.030          |
| N                            | 907 (87.3%)       | 519 (90.9%)      |                |
| Y                            | 132 (12.7%)       | 52 (9.1%)        |                |
| <b>cc_sx_headache</b>        |                   |                  | 0.007          |
| N                            | 615 (59.2%)       | 377 (66.0%)      |                |
| Y                            | 424 (40.8%)       | 194 (34.0%)      |                |

|                       | <b>0 (N=1039)</b> | <b>1 (N=571)</b> | <b>p value</b> |
|-----------------------|-------------------|------------------|----------------|
| <b>cc_sx_ams</b>      |                   |                  | 0.038          |
| N                     | 947 (91.1%)       | 537 (94.0%)      |                |
| Y                     | 92 (8.9%)         | 34 (6.0%)        |                |
| <b>cc_sx_seizure</b>  |                   |                  | 0.161          |
| N                     | 1016 (97.8%)      | 564 (98.8%)      |                |
| Y                     | 23 (2.2%)         | 7 (1.2%)         |                |
| <b>cc_sx_abd_pain</b> |                   |                  | 0.091          |
| N                     | 700 (67.4%)       | 408 (71.5%)      |                |
| Y                     | 339 (32.6%)       | 163 (28.5%)      |                |
| <b>cc_sx_naus_vom</b> |                   |                  | 0.620          |
| N                     | 630 (60.6%)       | 339 (59.4%)      |                |
| Y                     | 409 (39.4%)       | 232 (40.6%)      |                |
| <b>cc_sx_diarrhea</b> |                   |                  | 0.276          |
| N                     | 706 (67.9%)       | 403 (70.6%)      |                |
| Y                     | 333 (32.1%)       | 168 (29.4%)      |                |
| <b>cc_sx_conjunct</b> |                   |                  | 0.458          |
| N                     | 1038 (99.9%)      | 571 (100.0%)     |                |
| Y                     | 1 (0.1%)          | 0 (0.0%)         |                |
| <b>cc_sx_rash</b>     |                   |                  | 0.093          |
| N                     | 862 (83.0%)       | 492 (86.2%)      |                |
| Y                     | 177 (17.0%)       | 79 (13.8%)       |                |
| <b>cc_sx_lymphad</b>  |                   |                  | 0.458          |

|                            | <b>0 (N=1039)</b> | <b>1 (N=571)</b> | <b>p value</b> |
|----------------------------|-------------------|------------------|----------------|
| N                          | 1038 (99.9%)      | 571 (100.0%)     |                |
| Y                          | 1 (0.1%)          | 0 (0.0%)         |                |
| <b>cc_sx_bleeding</b>      |                   |                  | <b>0.073</b>   |
| N                          | 1005 (96.7%)      | 561 (98.2%)      |                |
| Y                          | 34 (3.3%)         | 10 (1.8%)        |                |
| <b>cc_sx_olfact_taste</b>  |                   |                  | <b>0.083</b>   |
| N                          | 944 (90.9%)       | 533 (93.3%)      |                |
| Y                          | 95 (9.1%)         | 38 (6.7%)        |                |
| <b>cc_sx_syncope</b>       |                   |                  | <b>0.376</b>   |
| N                          | 930 (89.5%)       | 519 (90.9%)      |                |
| Y                          | 109 (10.5%)       | 52 (9.1%)        |                |
| <b>risk_none</b>           |                   |                  | <b>0.003</b>   |
| N                          | 928 (89.3%)       | 481 (84.2%)      |                |
| Y                          | 111 (10.7%)       | 90 (15.8%)       |                |
| <b>risk_hcw</b>            |                   |                  | <b>0.407</b>   |
| N                          | 964 (92.8%)       | 536 (93.9%)      |                |
| Y                          | 75 (7.2%)         | 35 (6.1%)        |                |
| <b>risk_known_exposure</b> |                   |                  | <b>0.851</b>   |
| N                          | 923 (88.8%)       | 509 (89.1%)      |                |
| Y                          | 116 (11.2%)       | 62 (10.9%)       |                |
| <b>risk_homeless</b>       |                   |                  | <b>0.161</b>   |
| N                          | 1016 (97.8%)      | 564 (98.8%)      |                |

|                           | <b>0 (N=1039)</b> | <b>1 (N=571)</b> | <b>p value</b>    |
|---------------------------|-------------------|------------------|-------------------|
| Y                         | 23 (2.2%)         | 7 (1.2%)         |                   |
| <b>risk_nurs_home</b>     |                   |                  | <b>0.002</b>      |
| N                         | 1025 (98.7%)      | 550 (96.3%)      |                   |
| Y                         | 14 (1.3%)         | 21 (3.7%)        |                   |
| <b>risk_assist_living</b> |                   |                  | <b>0.007</b>      |
| N                         | 1039 (100.0%)     | 567 (99.3%)      |                   |
| Y                         | 0 (0.0%)          | 4 (0.7%)         |                   |
| <b>risk_prison_jail</b>   |                   |                  | <b>0.832</b>      |
| N                         | 1036 (99.7%)      | 569 (99.6%)      |                   |
| Y                         | 3 (0.3%)          | 2 (0.4%)         |                   |
| <b>risk_group_home</b>    |                   |                  | <b>0.335</b>      |
| N                         | 1034 (99.5%)      | 570 (99.8%)      |                   |
| Y                         | 5 (0.5%)          | 1 (0.2%)         |                   |
| <b>hr</b>                 |                   |                  | <b>&lt; 0.001</b> |
| Mean (SD)                 | 89.556 (15.733)   | 94.473 (17.267)  |                   |
| Range                     | 54.000 - 139.595  | 54.000 - 139.595 |                   |
| <b>rr</b>                 |                   |                  | <b>&lt; 0.001</b> |
| Mean (SD)                 | 18.160 (2.038)    | 19.067 (2.836)   |                   |
| Range                     | 13.000 - 32.000   | 13.000 - 32.000  |                   |
| <b>o2_sat_room</b>        |                   |                  | <b>&lt; 0.001</b> |
| Mean (SD)                 | 97.987 (1.886)    | 96.498 (2.907)   |                   |
| Range                     | 80.000 - 100.000  | 80.000 - 100.000 |                   |

|                          | <b>0 (N=1039)</b> | <b>1 (N=571)</b> | <b>p value</b> |
|--------------------------|-------------------|------------------|----------------|
| <b>pulse_ox_room_air</b> |                   |                  | < 0.001        |
| 0                        | 424 (40.8%)       | 138 (24.2%)      |                |
| 1                        | 615 (59.2%)       | 433 (75.8%)      |                |
| <b>o2_sat</b>            |                   |                  | < 0.001        |
| Mean (SD)                | 97.451 (2.335)    | 95.209 (3.857)   |                |
| Range                    | 67.000 - 100.000  | 62.000 - 100.000 |                |
| <b>temp</b>              |                   |                  | < 0.001        |
| Mean (SD)                | 37.103 (0.708)    | 37.467 (0.863)   |                |
| Range                    | 35.700 - 39.600   | 35.700 - 39.600  |                |
| <b>sbp</b>               |                   |                  | 0.717          |
| Mean (SD)                | 132.783 (19.373)  | 133.163 (21.437) |                |
| Range                    | 83.000 - 196.700  | 83.000 - 196.700 |                |
| <b>dbp</b>               |                   |                  | 0.108          |
| Mean (SD)                | 80.985 (12.505)   | 79.913 (13.317)  |                |
| Range                    | 46.000 - 122.000  | 46.000 - 122.000 |                |
| <b>hypotensive_yn</b>    |                   |                  | 0.203          |
| N                        | 989 (95.2%)       | 535 (93.7%)      |                |
| Y                        | 50 (4.8%)         | 36 (6.3%)        |                |
| <b>pmh_diabetes</b>      |                   |                  | < 0.001        |
| N                        | 920 (88.5%)       | 408 (71.5%)      |                |
| Y                        | 119 (11.5%)       | 163 (28.5%)      |                |
| <b>pmh_smoker</b>        |                   |                  | < 0.001        |

|                                  | <b>0 (N=1039)</b> | <b>1 (N=571)</b> | <b>p value</b>    |
|----------------------------------|-------------------|------------------|-------------------|
| N                                | 916 (88.2%)       | 538 (94.2%)      |                   |
| Y                                | 123 (11.8%)       | 33 (5.8%)        |                   |
| <b>pmh_systemic_hypertension</b> |                   |                  | <b>&lt; 0.001</b> |
| N                                | 820 (78.9%)       | 317 (55.5%)      |                   |
| Y                                | 219 (21.1%)       | 254 (44.5%)      |                   |
| <b>pmh_heart_disease</b>         |                   |                  | <b>0.002</b>      |
| N                                | 1016 (97.8%)      | 542 (94.9%)      |                   |
| Y                                | 23 (2.2%)         | 29 (5.1%)        |                   |
| <b>pmh_obesity</b>               |                   |                  | <b>&lt; 0.001</b> |
| N                                | 844 (81.2%)       | 377 (66.0%)      |                   |
| Y                                | 195 (18.8%)       | 194 (34.0%)      |                   |
| <b>pmh_hyperlipidemias</b>       |                   |                  | <b>&lt; 0.001</b> |
| N                                | 954 (91.8%)       | 435 (76.2%)      |                   |
| Y                                | 85 (8.2%)         | 136 (23.8%)      |                   |
| <b>pmh_heart_failure</b>         |                   |                  | <b>&lt; 0.001</b> |
| N                                | 1022 (98.4%)      | 542 (94.9%)      |                   |
| Y                                | 17 (1.6%)         | 29 (5.1%)        |                   |
| <b>pmh_afib</b>                  |                   |                  | <b>&lt; 0.001</b> |
| N                                | 1022 (98.4%)      | 542 (94.9%)      |                   |
| Y                                | 17 (1.6%)         | 29 (5.1%)        |                   |
| <b>pmh_cancer</b>                |                   |                  | <b>0.004</b>      |
| N                                | 1005 (96.7%)      | 535 (93.7%)      |                   |



|                               | <b>0 (N=1039)</b> | <b>1 (N=571)</b> | <b>p value</b> |
|-------------------------------|-------------------|------------------|----------------|
| Y                             | 34 (3.3%)         | 36 (6.3%)        |                |
| <b>pmh_copd</b>               |                   |                  | 0.056          |
| N                             | 1016 (97.8%)      | 549 (96.1%)      |                |
| Y                             | 23 (2.2%)         | 22 (3.9%)        |                |
| <b>pmh_asthma</b>             |                   |                  | 0.031          |
| N                             | 950 (91.4%)       | 503 (88.1%)      |                |
| Y                             | 89 (8.6%)         | 68 (11.9%)       |                |
| <b>prior_vte</b>              |                   |                  | 0.333          |
| N                             | 997 (96.0%)       | 542 (94.9%)      |                |
| Y                             | 42 (4.0%)         | 29 (5.1%)        |                |
| <b>pmh_other_lung_disease</b> |                   |                  | < 0.001        |
| N                             | 1033 (99.4%)      | 555 (97.2%)      |                |
| Y                             | 6 (0.6%)          | 16 (2.8%)        |                |
| <b>pmh_organ_transplant</b>   |                   |                  | 0.050          |
| N                             | 1035 (99.6%)      | 564 (98.8%)      |                |
| Y                             | 4 (0.4%)          | 7 (1.2%)         |                |
| <b>pmh_hiv_aids</b>           |                   |                  | 0.063          |
| N                             | 1017 (97.9%)      | 566 (99.1%)      |                |
| Y                             | 22 (2.1%)         | 5 (0.9%)         |                |
| <b>med_ibuprofen</b>          |                   |                  | 0.326          |
| No_NotDoc                     | 944 (90.9%)       | 527 (92.3%)      |                |
| Yes                           | 95 (9.1%)         | 44 (7.7%)        |                |

|                               | <b>0 (N=1039)</b> | <b>1 (N=571)</b> | <b>p value</b> |
|-------------------------------|-------------------|------------------|----------------|
| <b>med_acetaminophen</b>      |                   |                  | < 0.001        |
| No_NotDoc                     | 836 (80.5%)       | 397 (69.5%)      |                |
| Yes                           | 203 (19.5%)       | 174 (30.5%)      |                |
| <b>med_aspirin</b>            |                   |                  | < 0.001        |
| No_NotDoc                     | 996 (95.9%)       | 508 (89.0%)      |                |
| Yes                           | 43 (4.1%)         | 63 (11.0%)       |                |
| <b>med_statins</b>            |                   |                  | < 0.001        |
| No_NotDoc                     | 982 (94.5%)       | 464 (81.3%)      |                |
| Yes                           | 57 (5.5%)         | 107 (18.7%)      |                |
| <b>med_ace_inhibitors</b>     |                   |                  | < 0.001        |
| No_NotDoc                     | 997 (96.0%)       | 520 (91.1%)      |                |
| Yes                           | 42 (4.0%)         | 51 (8.9%)        |                |
| <b>med_angiotensin_rb</b>     |                   |                  | < 0.001        |
| No_NotDoc                     | 1004 (96.6%)      | 522 (91.4%)      |                |
| Yes                           | 35 (3.4%)         | 49 (8.6%)        |                |
| <b>med_antihypertensive</b>   |                   |                  | < 0.001        |
| No_NotDoc                     | 958 (92.2%)       | 474 (83.0%)      |                |
| Yes                           | 81 (7.8%)         | 97 (17.0%)       |                |
| <b>med_thiazolidinediones</b> |                   |                  | 0.469          |
| No_NotDoc                     | 1035 (99.6%)      | 570 (99.8%)      |                |
| Yes                           | 4 (0.4%)          | 1 (0.2%)         |                |
| <b>cxr_performed</b>          |                   |                  | < 0.001        |

|                   | <b>0 (N=1039)</b> | <b>1 (N=571)</b> | <b>p value</b> |
|-------------------|-------------------|------------------|----------------|
| N                 | 569 (54.8%)       | 117 (20.5%)      |                |
| Y                 | 470 (45.2%)       | 454 (79.5%)      |                |
| <b>race_eth</b>   |                   |                  | < 0.001        |
| Hispanic          | 304 (29.3%)       | 153 (26.8%)      |                |
| NonHisp_Black     | 365 (35.1%)       | 231 (40.5%)      |                |
| NonHisp_White     | 159 (15.3%)       | 132 (23.1%)      |                |
| Unknown_Other     | 211 (20.3%)       | 55 (9.6%)        |                |
| <b>bounceback</b> |                   |                  |                |
| 0                 | 0 (0.0%)          | 0 (0.0%)         |                |
| 1                 | 1039 (100.0%)     | 571 (100.0%)     |                |
